# Supplementary material for: MiR-192-5p Ameliorates Hepatic Lipid Metabolism in Non-Alcoholic Fatty Liver Disease by Targeting Yy1
Source: MDPI journal article supplement (doi:10.3390/biom14010034), 2023-12-26
Supplement: s1 [file s1]

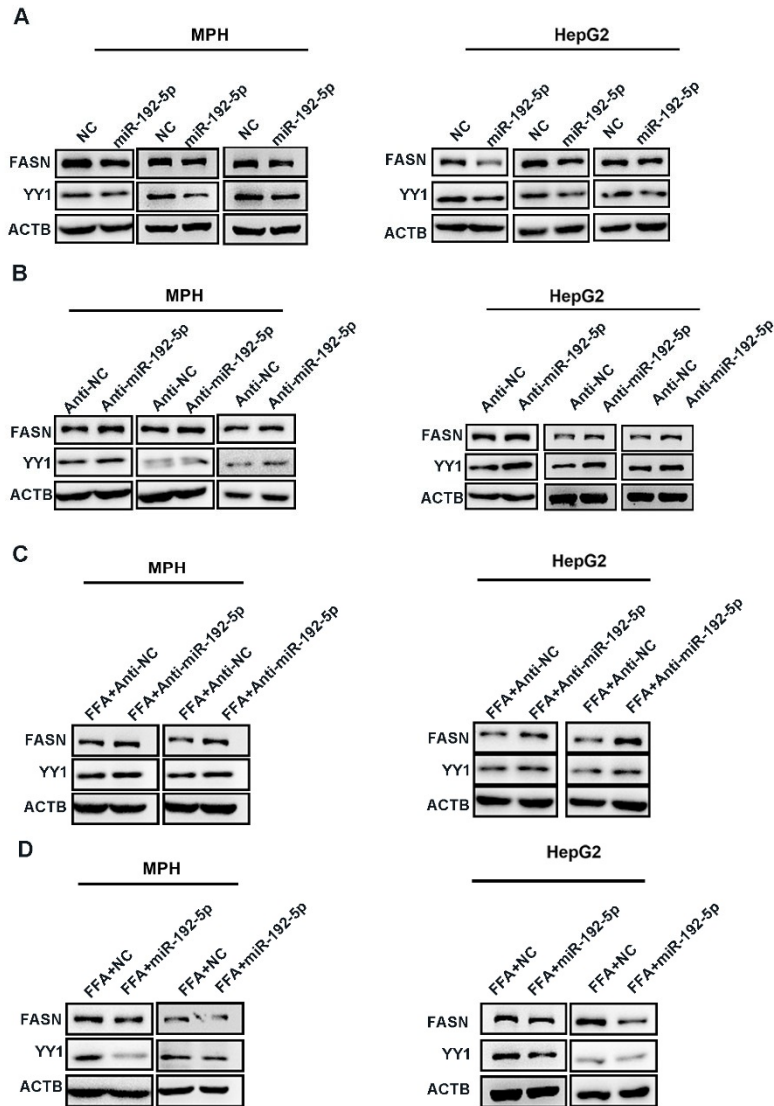

**Figure S1.** *Yy1* was a potential target of miR-192-5p and miR-192-5p inhibited hepatic triglyceride synthesis by regulating the YY1/FASN pathway. (A and B) Protein levels of YY1 and FASN in MPH and HepG2 cells treated with miR-192-5p mimics (A) or inhibitors (B) revealed by Western blotting. (C and D) Protein levels of YY1 and FASN in MPH and HepG2 cells treated with miR-192-5p inhibitors (C) or miR-192-5p mimics (D) and incubated with 0.4 mM FFA for 72 h.

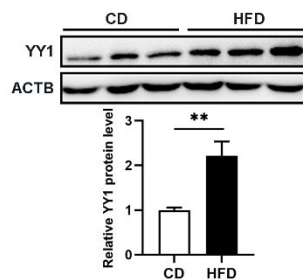

**Figure S2.** YY1 expression was upregulated in the liver of NAFLD mice, \*\*  $p < 0.01$ .

**Table S1.** Primers for qRT-PCR

| Gene                 | Forward primer ( 5'-3' ) | Reverse primer ( 5'-3' ) |
|----------------------|--------------------------|--------------------------|
| Mouse $\beta$ -Actin | TATCGCTGCGCTGGTCGTC      | CCACGATGGAGGGGAATACAG    |
| Mouse Srebf1         | GGAGCCATGGATTGCACATT     | GGCCCGGGAAGTCACTGT       |
| Mouse Acc1           | GGAGATGTACGCTGACCGAG     | TACCCGACGCATGGTTTTCA     |
| Mouse Fasn           | GGCCCCTCTGTTAATTGGCT     | GGATCTCAGGGTTGGGGTTG     |
| Mouse Scd1           | CCTCCGGAAATGAACGAGAGA    | CTGATAGGTGGGGTCGTGAA     |
| Mouse Yy1            | TGCCCTCATAAAGGCTGCAC     | CTCTCAACGAACGCTTTGCC     |
| Human $\beta$ -ACTIN | GGGAAATCGTGCGTGACATT     | GGAACCGCTCATTGCCAAT      |
| Human SREBF1         | ACAGTGACTTCCCTGGCCTAT    | GCATGGACGGGTACATCTTCAA   |
| Human ACC1           | CACCAGTTTTGCATTGAGAAC    | TACGCTGTTGAGTTCATAGGC    |
| Human FASN           | TATGAAGCCATCGTGGACGG     | GAAGAAGGAGAGCCGTTGG      |
| Human YY1            | GACACCCTCTACATCGCCAC     | TGTGGTCTCGATGGTCTCCA     |
