# Supplementary figures and images for: MiR-192-5p Ameliorates Hepatic Lipid Metabolism in Non-Alcoholic Fatty Liver Disease by Targeting Yy1
Source: MDPI journal article supplement (doi:10.3390/biom14010034), 2023-12-26

mouse Primary hepatocyte (MPH)

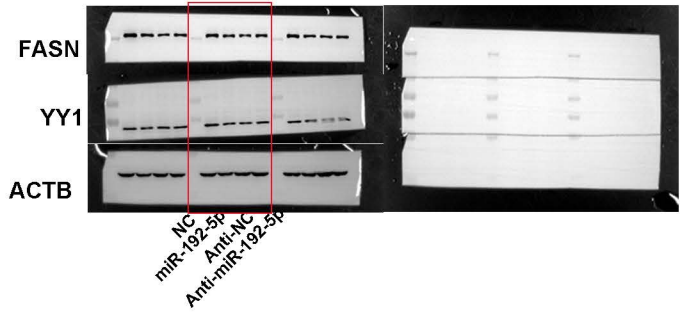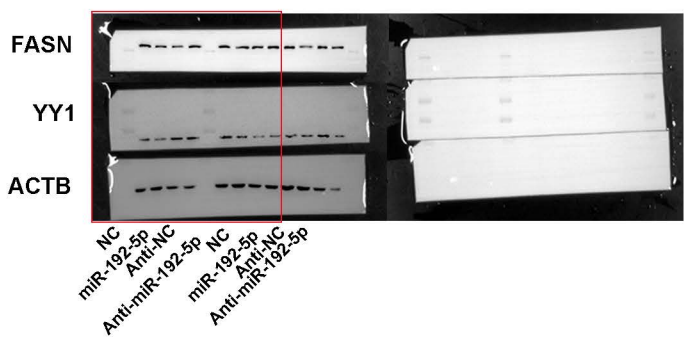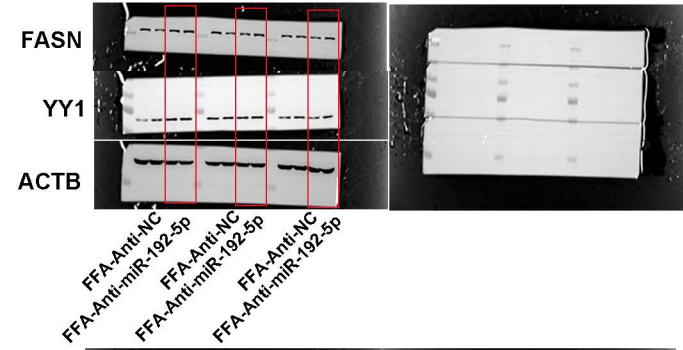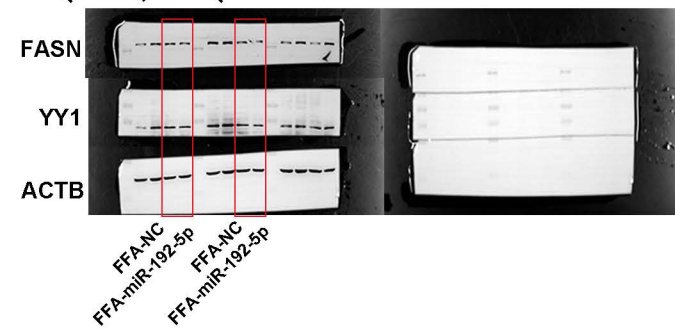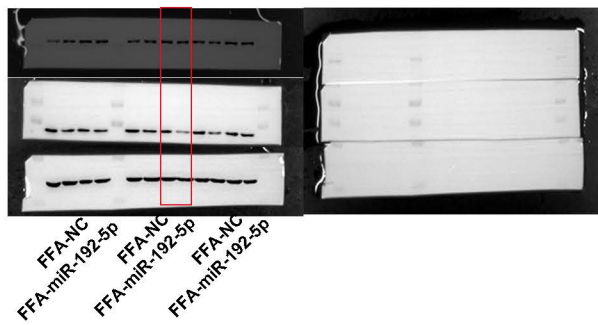

HepG2

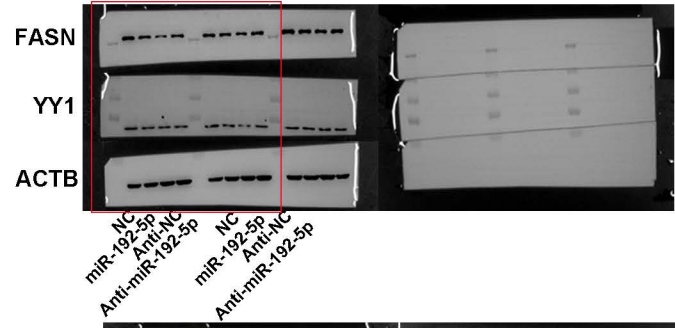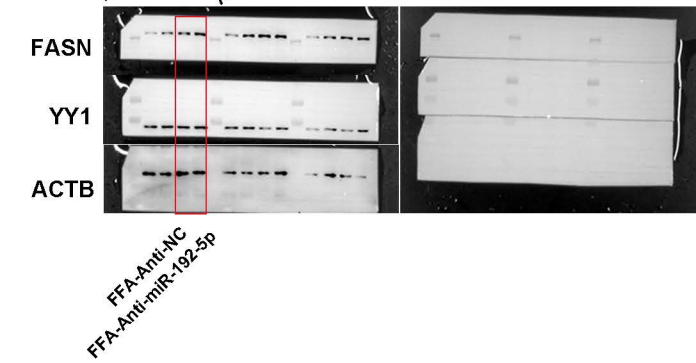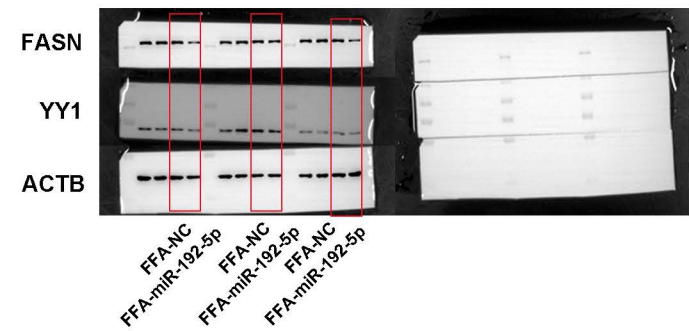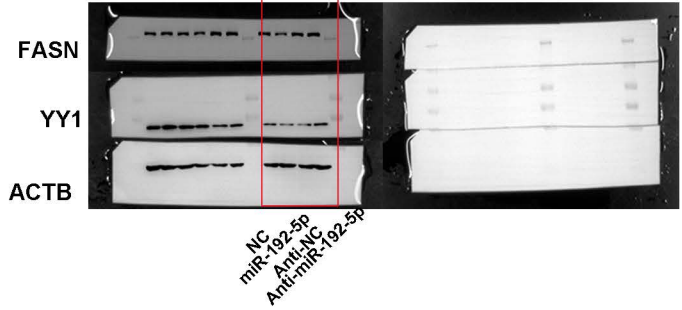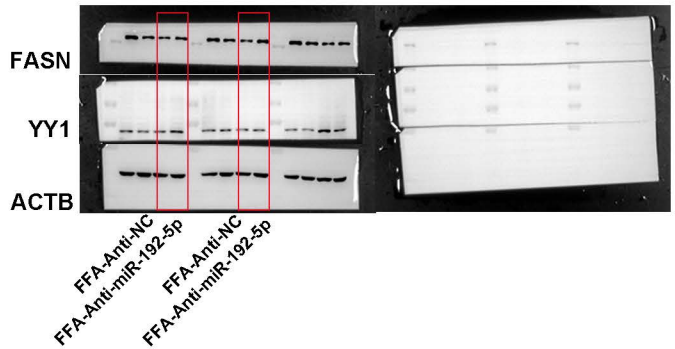

Mice

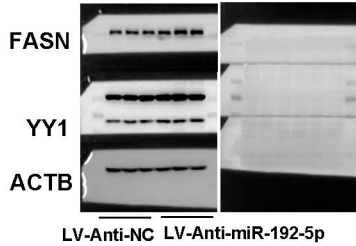

Supplement: s1 [file s1]
